# Supplementary material for: Quantifying Risk Pathway Crosstalk Mediated by miRNA to Screen Precision drugs for Breast Cancer Patients
Source: Genes (Basel). 2019 Aug 28;10(9):657. doi: 10.3390/genes10090657 (PMC6770221; doi:10.3390/genes10090657)
Supplement: Supplementary file 1 [file genes-10-00657-s001.xlsx]

## Sheet: Drug information
Name	DrugBank ID	Status (FDA)	Primary drug targets
Adriamycin	DB00997	Approved	7153;hsa-miR-181a;hsa-miR-135b;hsa-miR-139;hsa-miR-183;hsa-miR-199a;hsa-miR-22;hsa-miR-328;hsa-miR-375;hsa-miR-432;hsa-miR-645;hsa-miR-652;hsa-let-7e;hsa-miR-1;hsa-miR-135b;hsa-miR-145;hsa-miR-21;hsa-miR-218-2;hsa-miR-221;hsa-miR-298;hsa-miR-29b-2;hsa-miR-31;hsa-miR-335;hsa-miR-337;hsa-miR-383;hsa-miR-384;hsa-miR-434;hsa-miR-667;hsa-miR-692;hsa-miR-708;hsa-miR-709;hsa-miR-877;hsa-miR-146a;hsa-miR…
Arsenic trioxide	DB01169	Approved	207;5594;595;3725;5595;3551;7296;hsa-miR-210;hsa-miR-22;hsa-miR-221;hsa-miR-222;hsa-miR-34a;hsa-miR-19a;hsa-miR-222;hsa-miR-210;hsa-miR-24;hsa-miR-29a;hsa-miR-30a;hsa-miR-19a;hsa-miR-222;hsa-miR-210;hsa-miR-210;hsa-miR-24;hsa-miR-29a;hsa-miR-29a;hsa-miR-30a;hsa-miR-30a;hsa-let-7a;hsa-let-7d;hsa-let-7f;hsa-let-7g;hsa-miR-1;hsa-miR-100;hsa-miR-10a;hsa-miR-10b;hsa-miR-122;hsa-miR-124;hsa-miR-125a;hs…
Bicalutamide	DB01128	Approved	367;hsa-let-7e;hsa-miR-1;hsa-miR-100;hsa-miR-106a;hsa-miR-125b;hsa-miR-141;hsa-miR-143;hsa-miR-144;hsa-miR-149;hsa-miR-152;hsa-miR-17;hsa-miR-200a;hsa-miR-200b;hsa-miR-204;hsa-miR-210;hsa-miR-218;hsa-miR-23b;hsa-miR-30b;hsa-miR-30d;hsa-miR-32;hsa-miR-345;hsa-miR-363;hsa-miR-375;hsa-miR-376a;hsa-miR-376c;hsa-miR-377;hsa-miR-381;hsa-miR-424;hsa-miR-429;hsa-miR-551b;hsa-miR-557;hsa-miR-629;hsa-miR-6…
Bortezomib	DB00188	Approved	5707;5708;5689;5693;5690;hsa-miR-15a;hsa-miR-122;hsa-miR-15a;hsa-miR-16
Capecitabine	DB01101	Approved	7298;hsa-miR-125b;hsa-miR-137
Cyclophosphamide	DB00531	Approved	8856;hsa-miR-125b;hsa-miR-155;hsa-miR-34a;hsa-miR-34b;hsa-miR-34c
Docetaxel	DB01248	Approved	81027;596;8856;4133;4137;hsa-miR-371;hsa-miR-502;hsa-miR-514;hsa-miR-515;hsa-miR-518c;hsa-miR-99b;hsa-MiR-100
Epirubicin	DB00445	Approved	1105;7153;hsa-miR-302b
Etoposide	DB00773	Approved	7153;hsa-let-7a;hsa-let-7b;hsa-let-7e;hsa-let-7g;hsa-let-7i;hsa-miR-100;hsa-miR-125b;hsa-miR-15b;hsa-miR-21;hsa-miR-222;hsa-miR-26b;hsa-miR-638;hsa-miR-663;hsa-miR-768;hsa-miR-768;hsa-let-7a;hsa-let-7b
Everolimus	DB01590	Approved	2475;hsa-miR-20a;hsa-miR-21
Gefitinib	DB00317	Approved	1956;hsa-miR-134;hsa-miR-487b;hsa-miR-655
Gemcitabine	DB00441	Approved	7298;6240;hsa-let-7a-1;hsa-let-7b;hsa-let-7c;hsa-let-7d;hsa-let-7f-2;hsa-miR-1-2;hsa-miR-128a;hsa-miR-129-2;hsa-miR-133a-1;hsa-miR-139;hsa-miR-149;hsa-miR-154;hsa-miR-16-1;hsa-miR-186;hsa-miR-187;hsa-miR-194-1;hsa-miR-197;hsa-miR-199a-2;hsa-miR-202;hsa-miR-204;hsa-miR-205;hsa-miR-207;hsa-miR-21;hsa-miR-211;hsa-miR-212;hsa-miR-213;hsa-miR-217;hsa-miR-220;hsa-miR-24-1;hsa-miR-26a-1;hsa-miR-290;hsa-…
Goserelin	DB00014	Approved	3973;2798;hsa-miR-100;hsa-miR-10b;hsa-miR-1229;hsa-miR-125b;hsa-miR-128;hsa-miR-130b;hsa-miR-134;hsa-miR-135a;hsa-miR-148a;hsa-miR-149;hsa-miR-200a;hsa-miR-200b;hsa-miR-203;hsa-miR-210;hsa-miR-301a;hsa-miR-429;hsa-miR-601;hsa-miR-638;hsa-miR-663;hsa-miR-7;hsa-miR-7c;hsa-miR-887;hsa-miR-9;hsa-miR-9;hsa-miR-99a
Imatinib mesylate	DB00619	Approved	25;5159;3815;5156;1436;4914;5979;780;hsa-miR-320a;hsa-miR-142;hsa-miR-146a;hsa-miR-150;hsa-miR-199b;hsa-miR-212;hsa-miR-212;hsa-miR-328;hsa-miR-142;hsa-miR-146a;hsa-miR-150;hsa-miR-199b
Irinotecan	DB00762	Approved	7150;hsa-miR-1226;hsa-miR-23a;hsa-miR-24;hsa-miR-324;hsa-miR-500;hsa-miR-501;hsa-miR-650;hsa-miR-874
Lenalidomide	DB00480	Approved	5743;hsa-let-7;hsa-miR-15a;hsa-miR-193a;hsa-miR-196b;hsa-miR-210;hsa-miR-27b;hsa-miR-300;hsa-miR-34a;hsa-miR-34a;hsa-miR-378;hsa-miR-449a;hsa-miR-451;hsa-miR-589;hsa-miR-874;hsa-miR-98;hsa-miR-181a
Letrozole	DB01006	Approved	1588;hsa-let-7f
Medroxyprogesterone acetate	DB00603	Approved	2099;5241;hsa-miR-17;hsa-miR-17;hsa-miR-23a;hsa-miR-23a;hsa-miR-23b;hsa-miR-542;hsa-miR-542
Melphalan	DB01042	Approved	hsa-miR-15a;hsa-miR-16
Mitoxantrone	DB01204	Approved	7153;hsa-miR-1291;hsa-miR-324
Oxaliplatin (L-OHP)	DB00526	Approved	hsa-let-7b;hsa-let-7i;hsa-miR-10a;hsa-miR-128;hsa-miR-1280;hsa-miR-151;hsa-miR-151;hsa-miR-1826;hsa-miR-185;hsa-miR-191;hsa-miR-197;hsa-miR-25;hsa-miR-29a;hsa-miR-30d;hsa-miR-320d;hsa-miR-92a;hsa-miR-92b;hsa-miR-93;hsa-miR-1826;hsa-miR-1826;hsa-miR-191;hsa-miR-191;hsa-miR-197;hsa-miR-222;hsa-miR-222;hsa-miR-92a;hsa-miR-93
Paclitaxel	DB01229	Approved	81027;596;8856;4133;hsa-miR-126;hsa-miR-29c;hsa-miR-514;hsa-miR-99b;hsa-miR-15;hsa-miR-192;hsa-miR-217;hsa-miR-377;hsa-miR-30a;hsa-miR-367;hsa-miR-148a;hsa-miR-27a;hsa-miR-27b;hsa-miR-324;hsa-miR-451;hsa-miR-15;hsa-miR-192;hsa-miR-217;hsa-miR-377;hsa-miR-140
Rapamycin	DB00877	Approved	2280;2247;hsa-miR-29a;hsa-miR-29b;hsa-miR-29c
Sorafenib	DB00398	Approved	2324;2321;5894;2322;5159;3791;3815;673;2260;hsa-miR-1260;hsa-miR-1274a;hsa-miR-1274b;hsa-miR-1290;hsa-miR-1291;hsa-miR-194;hsa-miR-219-1;hsa-miR-222;hsa-miR-30a;hsa-miR-522;hsa-miR-548b;hsa-miR-548c;hsa-miR-629;hsa-miR-664;hsa-miR-193a
Sunitinib	DB01268	Approved	2324;2321;2322;5159;3791;3815;5156;1436;hsa-miR-10;hsa-miR-21;hsa-miR-221;hsa-miR-222
Tamoxifen	DB00675	Approved	2099;2100;5578;5584;5588;hsa-miR-106a;hsa-miR-152;hsa-miR-15a;hsa-miR-16;hsa-miR-17;hsa-miR-18;hsa-miR-191;hsa-miR-192;hsa-miR-193;hsa-miR-194;hsa-miR-195;hsa-miR-199b;hsa-miR-203;hsa-miR-20a;hsa-miR-20b;hsa-miR-22;hsa-miR-25;hsa-miR-27a;hsa-miR-28;hsa-miR-31;hsa-miR-324;hsa-miR-345;hsa-miR-34a;hsa-miR-350;hsa-miR-361;hsa-miR-362;hsa-miR-365;hsa-miR-375;hsa-miR-378;hsa-miR-422b;hsa-miR-424;hsa-mi…
Temozolomide	DB00853	Approved	hsa-let-7d;hsa-miR-125b;hsa-miR-133a;hsa-miR-135a;hsa-miR-137;hsa-miR-145;hsa-miR-153;hsa-miR-155;hsa-miR-181b;hsa-miR-193b;hsa-miR-195;hsa-miR-210;hsa-miR-219-1;hsa-miR-24;hsa-miR-26a;hsa-miR-584;hsa-miR-9;hsa-miR-21
Teniposide	DB00444	Approved	7153;hsa-miR-181b
Topotecan	DB01030	Approved	7150;hsa-miR-142;hsa-miR-34b;hsa-miR-431;hsa-miR-518c;hsa-miR-1226;hsa-miR-23a;hsa-miR-24;hsa-miR-324;hsa-miR-500;hsa-miR-501;hsa-miR-650;hsa-miR-874
Trastuzumab	DB00072	Approved	2064;2209;1956;2215;716;715;712;713;714;2214;2212;2213;hsa-miR-18a;hsa-miR-21;hsa-miR-210;hsa-miR-26a;hsa-miR-26b;hsa-miR-30b;hsa-miR-98;hsa-miR-18a;hsa-miR-21;hsa-miR-210;hsa-miR-26a;hsa-miR-26b;hsa-miR-30b;hsa-miR-98;hsa-miR-100;hsa-miR-100;hsa-miR-1228;hsa-miR-1228;hsa-miR-1246;hsa-miR-1246;hsa-miR-125a;hsa-miR-125a;hsa-miR-125a;hsa-miR-1268a;hsa-miR-1280;hsa-miR-1308;hsa-miR-149;hsa-miR-187;h…
Vemurafenib	DB08881	Approved	673;hsa-miR-145
Vinblastine	DB00570	Approved	203068;3725;7846;7283;hsa-miR-148a;hsa-miR-27a;hsa-miR-27b;hsa-miR-324;hsa-miR-328;hsa-miR-451
Vincristine	DB00541	Approved	203068;7277;hsa-miR-210;hsa-miR-494;hsa-miR-923;hsa-miR-93
Vorinostat (SAHA)	DB02546	Approved	55869;3065;3066;8841;10013;hsa-let-7b;hsa-miR-106a;hsa-miR-1227;hsa-miR-124;hsa-miR-126;hsa-miR-127;hsa-miR-129;hsa-miR-132;hsa-miR-134;hsa-miR-140;hsa-miR-155;hsa-miR-17;hsa-miR-182;hsa-miR-183;hsa-miR-193b;hsa-miR-197;hsa-miR-200b;hsa-miR-206;hsa-miR-22;hsa-miR-24-1;hsa-miR-299;hsa-miR-30c-1;hsa-miR-30e;hsa-miR-30e;hsa-miR-337;hsa-miR-345;hsa-miR-376a;hsa-miR-379;hsa-miR-381;hsa-miR-382;hsa-miR…
Cisplatin	DB00515	Approved	475;7018;2;4350;hsa-miR-106a;hsa-miR-185;hsa-miR-23b;hsa-miR-331;hsa-miR-340;hsa-miR-381;hsa-miR-520f;hsa-miR-142;hsa-miR-192;hsa-miR-204;hsa-miR-30d;hsa-miR-3125;hsa-miR-325;hsa-miR-380;hsa-miR-3974;hsa-miR-411;hsa-miR-425;hsa-miR-449b;hsa-miR-4633;hsa-miR-4639;hsa-miR-4659b;hsa-miR-4668;hsa-miR-4727;hsa-miR-4745;hsa-miR-4767;hsa-miR-4768;hsa-miR-487b;hsa-miR-520e;hsa-miR-720;hsa-miR-877;hsa-miR…
5-Fluorouracil	DB00544	Approved	7298;hsa-miR-106a;hsa-miR-106b;hsa-miR-10a;hsa-miR-1275;hsa-miR-128;hsa-miR-1308;hsa-miR-151;hsa-miR-151;hsa-miR-15b;hsa-miR-17;hsa-miR-182;hsa-miR-1826;hsa-miR-18a;hsa-miR-191;hsa-miR-191;hsa-miR-197;hsa-miR-200c;hsa-miR-20a;hsa-miR-222;hsa-miR-222;hsa-miR-24;hsa-miR-29a;hsa-miR-31;hsa-miR-320a;hsa-miR-320a;hsa-miR-320c;hsa-miR-320d;hsa-miR-423;hsa-miR-423;hsa-miR-92a;hsa-miR-92a;hsa-miR-93;hsa-…
